# Supplementary material
Source: PubMed Central journal article supplement (PMC3322221)
Supplement: mmc1.pdf [file mmc1.pdf]

## Supplemental Data

# Primate Genome Gain and Loss: A Bone Dysplasia, Muscular Dystrophy, Bone Cancer Syndrome Resulting from Mutated Retroviral-Derived MTAP Transcripts

Olga Camacho-Vanegas, Sandra Catalina Camacho, Jacob Till, Irene Miranda-Lorenzo, Esteban Terzo, Maria Celeste Ramirez, Vern Schramm, Grace Cordovano, Giles Watts, Sarju Mehta, Virginia Kimonis, Benjamin Hoch, Keith D. Philibert, Carsten A. Raabe, David F. Bishop, Marc J. Glucksman, and John A. Martignetti

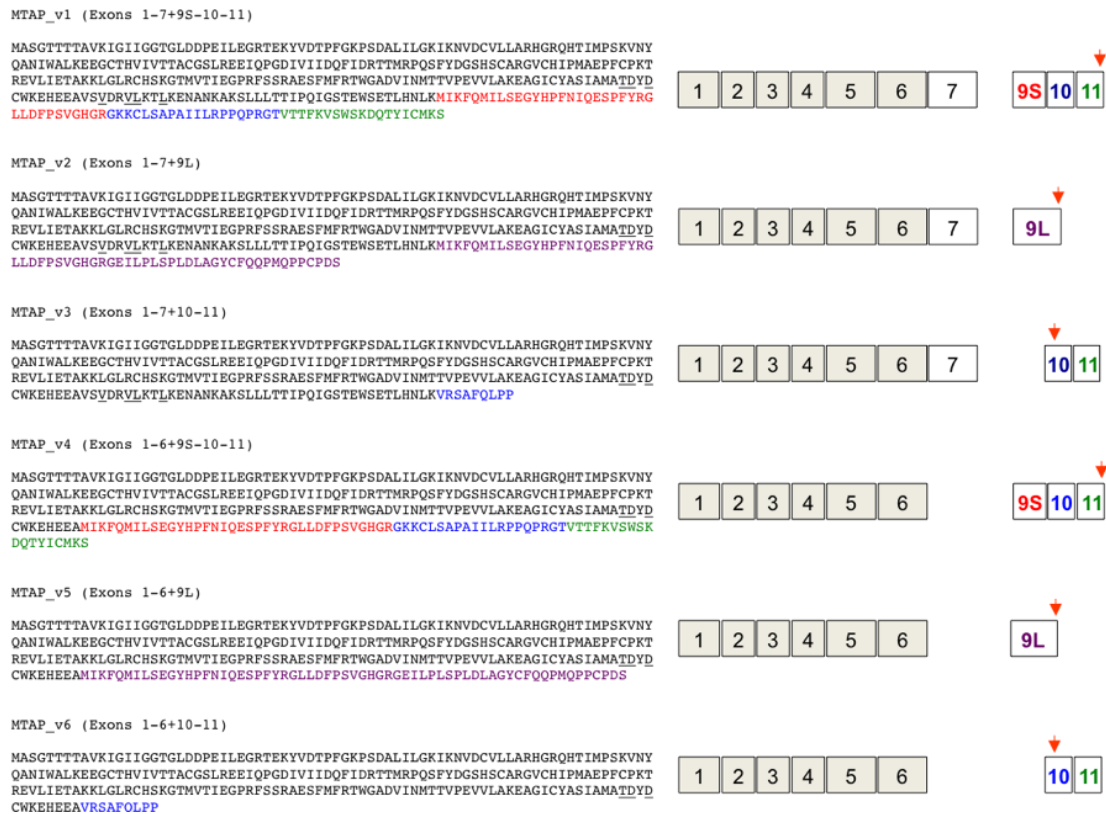

Figure S1. Amino Acid Sequence of MTAP Splice Variants

Exons 1-7 are shown in black typeface and MTA-coordinating amino acids are underlined. Exon 9S - red; 9L - purple, 10 - blue (two different reading frames are used); 11 - green. Arrows above exons depict the positions of translational stop codons.

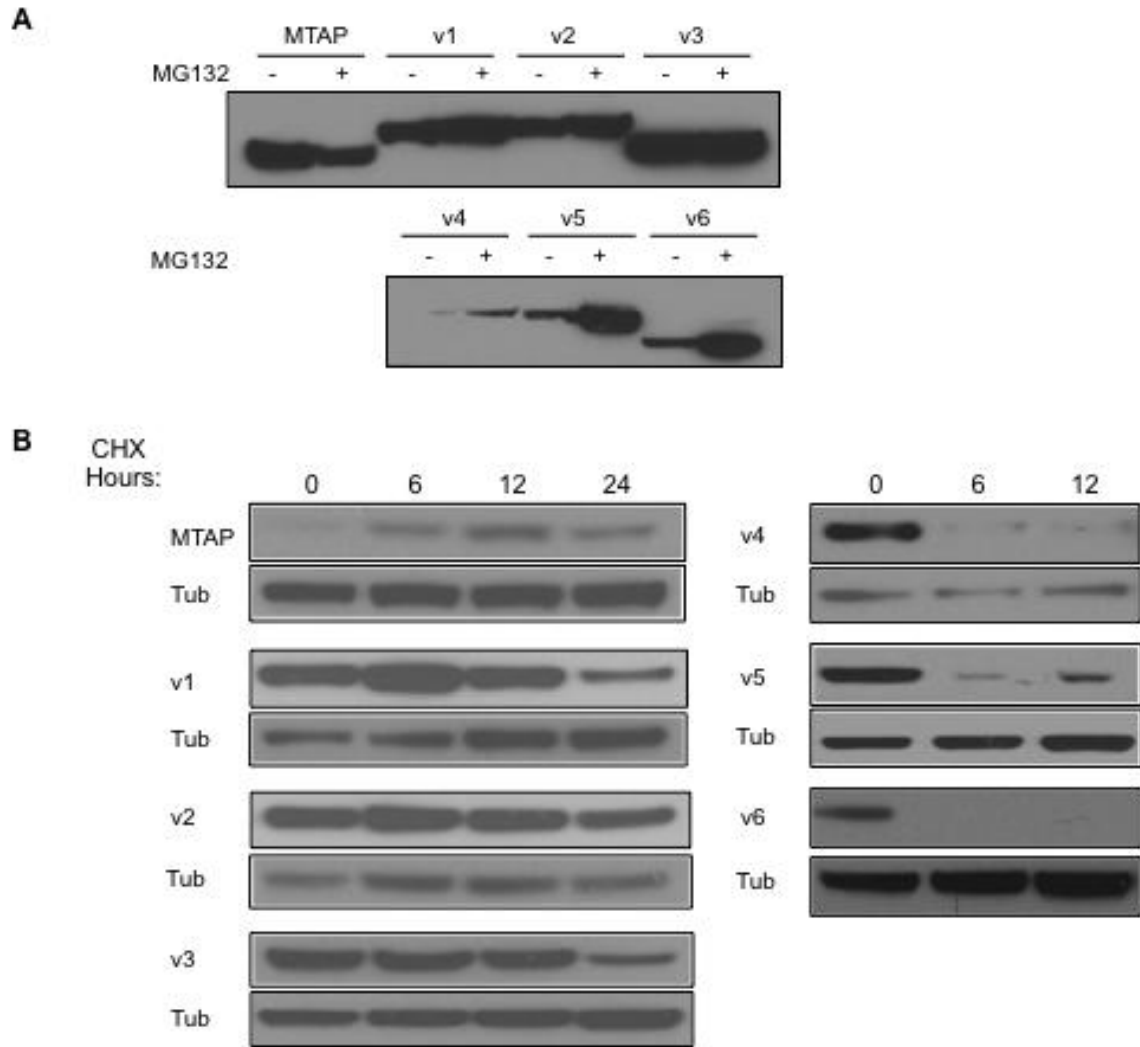

**Figure S2. Protein Stability of MTAP Splice Variants**

(A) Transiently transfected MCF7 cells expressing each MTAP isoform were treated with MG132 (5mM) for 4 hours.

(B) Transiently transfected MCF7 cells were exposed to cyclohexamide (10μM) for 6, 12 and 24 hours. Archetype MTAP: MTAP

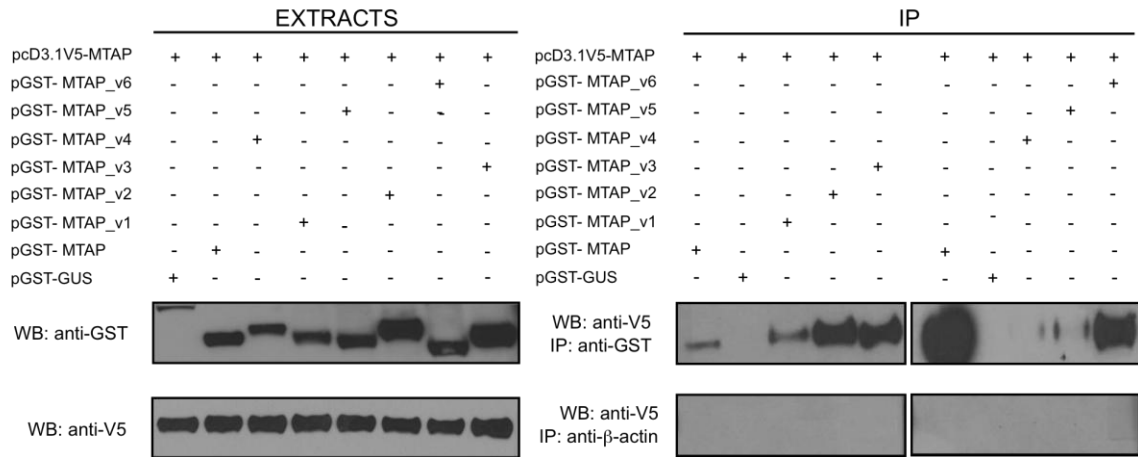

**Figure S3. Coimmunoprecipitation Studies Showing Interaction between Archetype MTAP and All MTAP Splice Variants**

Combinations of differentially-tagged (-V5 and -GST) isoforms of MTAP were co-expressed in PC3M cells and co-immunoprecipitated. Immunoprecipitation was performed with anti-GST and anti- $\beta$ -actin as control. Lysates (left panel). Co-immunoprecipitates: MTAP, MTAP\_v1, v2, v4, v5 and v6 (right panel). Archetype MTAP: MTAP

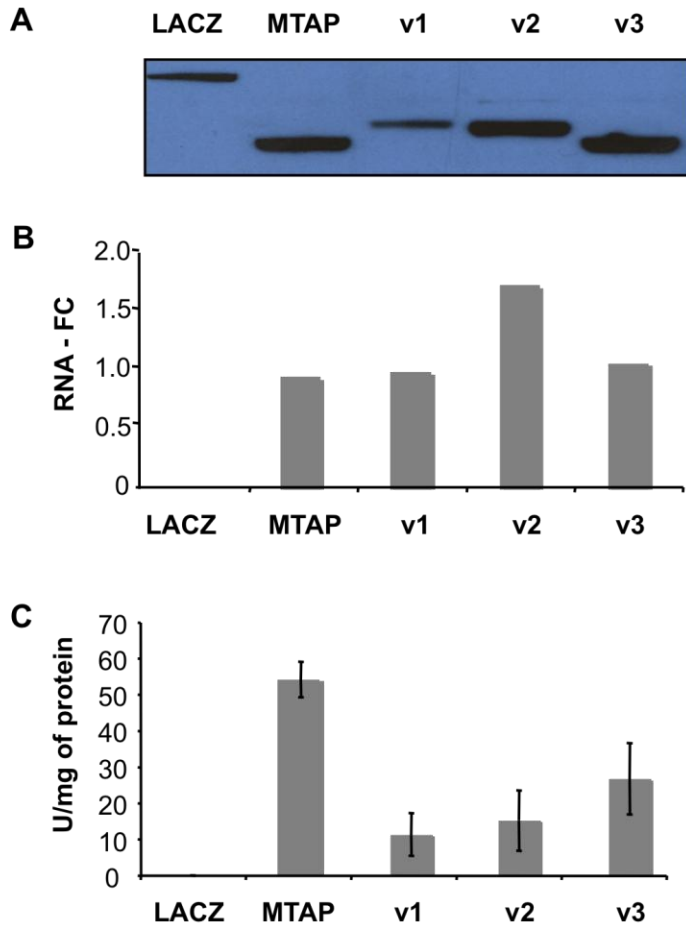

**Figure S4. Determination of MTAP Activity on Cell Extracts from MCF7 Stably Expressing MTAP\_v1, v2, and v3 V5-Tagged Fusion Proteins**

(A) Western-blot showing protein expression.

(B) Quantitative real-time PCR results using primers that recognize all variants.

(C) Intracellular MTAP activity levels.

The error bars represent the averages of three independent experiments.

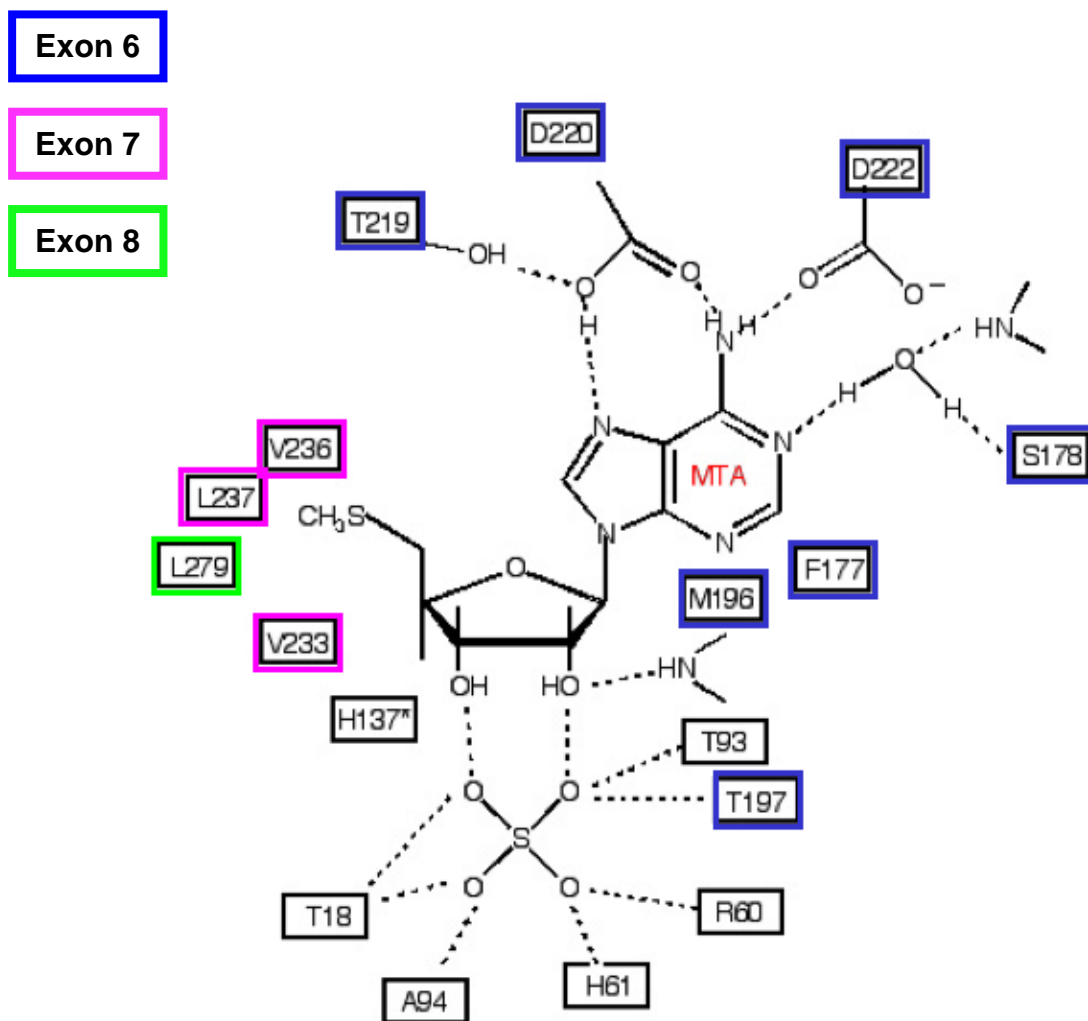

**Figure S5. Amino Acids Coordinating to MTA**

Note that exon 8 contributes only one amino acid in this structure.

**Table S1. DNA and cDNA Amplifying Primers**

| <b>MICROSATELLITE PRIMERS</b> | 5'                           | 3' |
|-------------------------------|------------------------------|----|
| D9SB3 Forward                 | CGGAATCAACCTAAATGTAG         |    |
| D9SB3 Reverse                 | CAGTTCTGTTACATTGCTG          |    |
| AL624 Forward                 | CACCAAAGTGAGTGTGCCAT         |    |
| AL624 Reverse                 | GCTTTACCAGCTATCTGGGT         |    |
| AL882 Forward                 | CATCACAGGACATAGCAGC          |    |
| AL882 Reverse                 | TGAGGCTTGATGATGGTAG          |    |
| <b>GENOMIC PRIMERS</b>        |                              |    |
| gExon 1 Forward               | GAACGCGGGAATTCGATTTGG        |    |
| gExon 1 Reverse               | TGCAAGCGTACCCTCTCCTC         |    |
| gExon 2 Forward               | GGCTTGGCAGGAATGGAG           |    |
| gExon 2 Reverse               | TCAAGCCAGCAAGGAGAAATG        |    |
| gExon 3 Forward               | GAGTCCTGTTGTGGTTGAA          |    |
| gExon 3 Reverse               | CAATGTAAGGGGCAAGAGCA         |    |
| gExon 4 Forward               | ACTCTAGGAGAAAACAGTTGG        |    |
| gExon 4 Reverse               | ACCAGCTACAATAGCCTAAAG C      |    |
| gExon 5 Forward               | AGATAAAGTTGACTCACCAGC        |    |
| gExon 5 Reverse               | CCAATTAACCAAATGCCAGAT G      |    |
| gExon 6 Forward               | AGTTGTGCATGTGCTAGTATG        |    |
| gExon 6 Reverse               | ACACCCTATTGGCACCCAGA         |    |
| gExon 7 Forward               | GCAGTGAATTTTAAGTTCTAGTA      |    |
| gExon 7 Reverse               | GGCATAAAATACATGAGGACCAA      |    |
| gExon 8 Forward               | GTATGTTTCCTGCGTCCTCA         |    |
| gExon 8 Reverse               | CATACTCTTTGATAGGCAAGGG       |    |
| gExon 9 Forward               | AAGTTCCAGATGATCCTCAG         |    |
| gExon 9 Reverse               | CAGTCTTCTGTAAGTCTTC          |    |
| <b>CDNA PRIMERS</b>           |                              |    |
| Exon 1 Forward                | GCACTGCTCACTCCCGCGCA         |    |
| Exon 5 Forward                | CAGAGGAGTGTGCCATATTC         |    |
| Exon 6 Forward                | GAGGGACCTCGTTTTAGCTC         |    |
| Exon 8 Reverse                | CATACTCTTTGATAGGCAAGGG       |    |
| Exon 11 Reverse               | ACTATAGGATGTCATGATTT         |    |
| Exon 6F1                      | GACAGATTATGACTGCTGGAAGGAG    |    |
| <b>REAL TIME PCR PRIMERS</b>  |                              |    |
| MTAP- Forward                 | CGGTGGACCGGGTCTTAAAGAC       |    |
| MTAP-wt Reverse               | ATGTCTTGGTAATAAAACAGAAAAGTGG |    |

|                         |                                              |
|-------------------------|----------------------------------------------|
| MTAP_v1 Forward         | ACCCTCCATAACCTGAAGATG                        |
| MTAP_v1 Reverse         | CTGAAAGGCACTTCTTACCTC                        |
| MTAP_v2 Forward         | CTCCATAACCTGAAGATGATCA                       |
| MTAP_v2 Reverse         | GACAGGGGCAGGATTTAC                           |
| MTAP_v3 Forward         | ACCCTCCATAACCTGAAGGTA                        |
| MTAP_v3 Reverse         | GGATGTCATGATTTTCATGCAAAT                     |
| MTAP_v4 Forward         | AGCACGAGGAAGCAATGATC                         |
| MTAP_v4 Reverse         | GCTGAAAGGCACTTCTTACCT                        |
| MTAP_v5 Forward         | AGCACGAGGAAGCAATGATC                         |
| MTAP_v5 Reverse         | CCAGCCAGGTCTAAGGGAG                          |
| MTAP_v6 Forward         | AGGAGCACGAGGAAGCAGTA                         |
| MTAP_v6 Reverse         | GGATGTCATGATTTTCATGCAAAT                     |
| MTAP-All Forward        | ACCACCACCGCCGTGAAG                           |
| MTAP-All Reverse        | CTTGCAAGGAGGACGCAATC                         |
| Actin Forward           | CAATGACCCCTTCATTGACC                         |
| Actin Reverse           | GATCTCGCTCCTGGAAGATG                         |
| HPRT Forward            | TATTGTAATTGACCAGTCAACAG                      |
| HPRT Reverse            | GGTCCTTTTCACCAGCAAG                          |
| <b>PLASMID PRIMERS</b>  |                                              |
| V5: for MTAP            | ATGTCTTGTAATAAAACAGAAAAGTGG                  |
| V5: for v1-v2           | TGATTTTCATGCAAATATATGTTG                     |
| V5: for v3-v4           | TGGCGGGAGCTGAAAGGCACTTC                      |
| Intron 5-Sall Forward   | <u>ACGCGTCGACGTCGGCTGGGGAAACAGGATTATGTGA</u> |
| Intron 8-NheI reverse   | <u>CTAGCTAGCTAGATGTAGAGTTCCCAGCAC</u>        |
| Intron 8-SpeI Forward   | <u>GGACTAGTTCAGCCTGATGATTATAACCAATG</u>      |
| Intron 9-XhoI Reverse   | <u>CTAGCTAGCTAGTTCCATTATCATTTTGCCTTTTG</u>   |
| Exon 9-XhoI Forward     | <u>CCGCTCGAGCGGCAACAGAGCGAGAGT</u> CTTC      |
| Intron 11-SacII Reverse | <u>TCCCCGCGGGGAACCACAACCTATGAGATGCT</u>      |

Underlining in the PCR primers above indicates the introduced sequence including restriction sites.
